# Supplementary material for: Association of ECT With Risks of All-Cause Mortality and Suicide in Older Medicare Patients
Source: Atypon-hosted journal article supplement (doi:10.1176/appi.ajp.2021.21040351), 2021-09-10
Supplement: appi.ajp.2021.21040351.ds001.pdf [file appi.ajp.2021.21040351.ds001.pdf]

## Contents

**Table S1.** ICD-9-CM and ICD-10 codes for principal hospital diagnoses

**Table S2.** ICD-10 codes for suicide deaths

**Table S3.** Baseline differences in clinical and demographic characteristics between electroconvulsive therapy (ECT) and control groups after inverse probability treatment weighting

**Table S4.** Hazard ratios for all-cause mortality and suicide deaths using Cox proportional hazard models following inverse probability treatment weighting

**Table S5.** Hazard ratios for all-cause mortality and suicide deaths using Cox proportional hazard models following exact matching (1:1 ratio) including length-of-stay as an exact-matched variable

**Table S6.** Baseline demographic and clinical characteristics: Therapeutic versus subtherapeutic ECT groups

## References

**TABLE S1. ICD-9-CM and ICD-10 codes for principal hospital diagnoses**

|                                        | <b>ICD-9-CM</b>                                                                    | <b>ICD-10</b>                                                    |
|----------------------------------------|------------------------------------------------------------------------------------|------------------------------------------------------------------|
| Major depressive disorder              | 2961; 2962; 2963; 2969; 3004; 3011; 3090; 311                                      | F322; F325; F329; F330; F331; F332; F334; F338; F339; F39        |
| Bipolar disorder                       | 2960; 2964; 2965; 2966; 2967; 2968;                                                | F301; F302; F311; F312; F313; F314; F315; F316; F317; F318; F319 |
| Psychotic depression                   | 2980;                                                                              | F323; F333                                                       |
| Schizophrenia/schizoaffective disorder | 2938; 2951; 2952; 2953; 2954; 2956; 2957; 2958; 2959; 2971; 2978; 2979; 2988; 2989 | F200; F201; F202; F203; F250; F251; F258; F259; F28; F29         |
| Other                                  | Other psychiatric ICD codes not mentioned above.                                   |                                                                  |

Note: The principal diagnosis, as defined in the NUBC Official UB-04 Data Specifications Manual, is "the condition established after study to be chiefly responsible for occasioning the admission of the patient for care."<sup>1</sup>

**TABLE S2. ICD-10 codes for suicide deaths**

|                      | <b>113 ICD-10<br/>Cause of death<br/>recodes<sup>2</sup></b> | <b>358 ICD-10<br/>Cause of death<br/>recodes<sup>3</sup></b> | <b>Individual ICD-10 code</b>                                                                                                                                                      |
|----------------------|--------------------------------------------------------------|--------------------------------------------------------------|------------------------------------------------------------------------------------------------------------------------------------------------------------------------------------|
| Undetermined suicide | 124; 125; 126                                                | 42400; 42500; 42600;<br>42700; 42800; 42900;<br>43000; 43100 | Y10; Y11; Y12; Y13; Y14;<br>Y15; Y16; Y17; Y18; Y19;<br>Y20; Y21; Y22; Y23; Y24;<br>Y25; Y26; Y27; Y28; Y29;<br>Y30; Y31; Y32; Y33; Y34                                            |
| Determined suicide   |                                                              |                                                              | If first three characters include:<br>X60; X61; X62; X63; X64;<br>X65; X66; X67; X68; X69;<br>X70; X71; X72; X73; X74;<br>X75; X76; X77; X78; X79;<br>X80; X81; X82; X83; X84; Y87 |
| Accidental death     | 119,122                                                      |                                                              | W32-W34; X40-X49                                                                                                                                                                   |

**TABLE S3. Baseline differences in clinical and demographic characteristics between electroconvulsive therapy (ECT) and control groups after inverse probability treatment weighting**

|                                        | Control<br>(N=31,160)<br>% | ECT<br>(N=10,460)<br>% | Standardized<br>difference |
|----------------------------------------|----------------------------|------------------------|----------------------------|
| Age, years                             |                            |                        | <0.01                      |
| 65-74                                  | 55.2                       | 55.1                   |                            |
| 75-84                                  | 33.9                       | 34.1                   |                            |
| 85+                                    | 10.8                       | 10.7                   |                            |
| Female sex                             | 65.5                       | 66.1                   | 0.01                       |
| Year of index hospitalization          |                            |                        | 0.09                       |
| 2011                                   | 21.7                       | 23.2                   |                            |
| 2012                                   | 20.9                       | 22.8                   |                            |
| 2013                                   | 20.1                       | 19.8                   |                            |
| 2014                                   | 18.3                       | 18.1                   |                            |
| 2015                                   | 19.0                       | 16.1                   |                            |
| Urban residence                        | 82.0                       | 82.5                   | 0.01                       |
| Modified Elixhauser index score        |                            |                        | 0.04                       |
| 0                                      | 27.9                       | 27.8                   |                            |
| 1-5                                    | 19.5                       | 19.4                   |                            |
| 6-12                                   | 27.7                       | 27.8                   |                            |
| >12                                    | 24.9                       | 25.0                   |                            |
| Past-year psychiatric hospitalization  |                            |                        | 0.04                       |
| 0                                      | 60.4                       | 59.3                   |                            |
| 1                                      | 24.7                       | 25.3                   |                            |
| 2                                      | 9.0                        | 9.2                    |                            |
| ≥3                                     | 6.0                        | 6.3                    |                            |
| Past-year suicide attempt              |                            |                        | 0.15                       |
| 0                                      | 95.0                       | 94.8                   |                            |
| 1                                      | 4.4                        | 4.6                    |                            |
| ≥2                                     | 0.6                        | 0.6                    |                            |
| Race/ethnicity                         |                            |                        | 0.17                       |
| Non-Hispanic White                     | 87.5                       | 87.4                   |                            |
| Hispanic                               | 3.9                        | 3.7                    |                            |
| African American                       | 6.8                        | 5.6                    |                            |
| Other                                  | 1.5                        | 2.8                    |                            |
| Geographic region                      |                            |                        | <0.01                      |
| Northeast                              | 24.6                       | 24.7                   |                            |
| South                                  | 21.8                       | 21.8                   |                            |
| Midwest                                | 43.0                       | 42.8                   |                            |
| West                                   | 10.7                       | 10.8                   |                            |
| Principal hospital diagnosis           |                            |                        | 0.03                       |
| Major depressive disorder              | 70.4                       | 69.3                   |                            |
| Bipolar disorder                       | 18.8                       | 19.9                   |                            |
| Psychotic depression                   | 0.9                        | 0.9                    |                            |
| Schizophrenia/schizoaffective disorder | 6.5                        | 6.7                    |                            |
| Other                                  | 3.3                        | 3.3                    |                            |
| Median Income of Zip Code              |                            |                        | <0.01                      |
| <\$40,000                              | 22.6                       | 22.6                   |                            |
| \$40,000 - \$60,000                    | 40.1                       | 40.0                   |                            |
| ≥\$60,000                              | 35.3                       | 35.4                   |                            |
| Past-year psychotropic medication use  |                            |                        |                            |

|                               |      |      |       |
|-------------------------------|------|------|-------|
| Antidepressant                | 57.7 | 56.2 | 0.03  |
| Lithium                       | 3.9  | 3.9  | <0.01 |
| Antiepileptic Mood stabilizer | 25.5 | 24.8 | 0.02  |
| Antipsychotic                 | 36.1 | 36.0 | <0.01 |

**TABLE S4. Hazard ratios for all-cause mortality and suicide deaths using Cox proportional hazard models following inverse probability treatment weighting**

| Outcome                    | Hazard Ratio (95% CI) |
|----------------------------|-----------------------|
| <i>All-cause mortality</i> |                       |
| 30 days*                   | 0.54 (0.49 to 0.61)   |
| 60 days                    | 0.56 (0.52 to 0.61)   |
| 90 days                    | 0.55 (0.51 to 0.57)   |
| 180 days                   | 0.57 (0.54 to 0.61)   |
| 365 days                   | 0.61 (0.58 to 0.64)   |
| <i>Suicide death</i>       |                       |
| 30 days                    | 0.38 (0.25 to 0.58)   |
| 60 days                    | 0.44 (0.31 to 0.62)   |
| 90 days                    | 0.52 (0.39 to 0.70)   |
| 180 days                   | 0.88 (0.70 to 1.10)   |
| 365 days                   | 0.89 (0.74 to 1.06)   |

\*Days following index date, which is hospital discharge date.

**TABLE S5. Hazard ratios for all-cause mortality and suicide deaths using Cox proportional hazard models following exact matching (1:1 ratio) including length-of-stay as an exact-matched variable**

| Outcome                    | Hazard Ratio (95% CI) |
|----------------------------|-----------------------|
| <i>All-cause mortality</i> |                       |
| 30 days*                   | 0.58 (0.46 to 0.72)   |
| 60 days                    | 0.58 (0.49 to 0.68)   |
| 90 days                    | 0.53 (0.46 to 0.61)   |
| 180 days                   | 0.53 (0.47 to 0.59)   |
| 365 days                   | 0.56 (0.51 to 0.61)   |
| <i>Suicide death</i>       |                       |
| 30 days                    | 0.67 (0.31 to 1.44)   |
| 60 days                    | 0.67 (0.36 to 1.27)   |
| 90 days                    | 0.66 (0.37 to 1.18)   |
| 180 days                   | 1.03 (0.65 to 1.64)   |
| 365 days                   | 0.99 (0.68 to 1.42)   |

\*Days following index date, which is hospital discharge date.

**TABLE S6. Baseline clinical and demographic characteristics: Therapeutic versus subtherapeutic electroconvulsive therapy (ECT) groups**

|                                        | Therapeutic ECT<br>(N=6,670)<br>n (%) | Subtherapeutic ECT<br>(N=2,063)<br>n (%) | Standardized<br>difference |
|----------------------------------------|---------------------------------------|------------------------------------------|----------------------------|
| Age                                    |                                       |                                          | 0.09                       |
| 65-74                                  | 3,612 (54.2)                          | 1,155 (56.0)                             |                            |
| 75-84                                  | 2,313 (34.7)                          | 651 (31.6)                               |                            |
| 85+                                    | 745 (11.2)                            | 257 (12.5)                               |                            |
| Female sex                             | 4,379 (65.7)                          | 1,343 (65.1)                             | 0.02                       |
| Year of index hospitalization          |                                       |                                          | 0.03                       |
| 2011                                   | 1,513 (22.7)                          | 479 (23.2)                               |                            |
| 2012                                   | 1,492 (22.4)                          | 464 (22.5)                               |                            |
| 2013                                   | 1,340 (20.1)                          | 403 (19.5)                               |                            |
| 2014                                   | 1,230 (18.4)                          | 381 (18.5)                               |                            |
| 2015                                   | 1,095 (16.4)                          | 336 (16.3)                               |                            |
| Urban residence                        | 5,728 (85.9)                          | 1,758 (85.2)                             | 0.01                       |
| Modified Elixhauser index score        |                                       |                                          | 0.08                       |
| 0                                      | 1,781 (26.7)                          | 571 (27.7)                               |                            |
| 1-5                                    | 1,311 (19.7)                          | 378 (18.3)                               |                            |
| 6-12                                   | 1,821 (27.3)                          | 612 (29.7)                               |                            |
| >12                                    | 1,757 (26.3)                          | 502 (24.3)                               |                            |
| Past-year psychiatric hospitalizations |                                       |                                          | 0.15                       |
| 0                                      | 3,823 (57.3)                          | 1,286 (62.3)                             |                            |
| 1                                      | 1,690 (25.3)                          | 493 (23.9)                               |                            |
| 2                                      | 694 (10.4)                            | 152 (7.4)                                |                            |
| ≥3                                     | 463 (6.9)                             | 132 (6.4)                                |                            |
| Past-year suicide attempts             |                                       |                                          | 0.05                       |
| 0                                      | 6,291 (94.3)                          | 1,964 (95.2)                             |                            |
| 1                                      | 213 (4.8)                             | 88 (4.3)                                 |                            |
| ≥2                                     | 61 (0.9)                              | 11 (0.5)                                 |                            |
| Race/ethnicity                         |                                       |                                          | 0.16                       |
| Non-Hispanic White                     | 6,091 (91.3)                          | 1,886 (91.4)                             |                            |
| Hispanic                               | 176 (2.6)                             | 52 (2.5)                                 |                            |
| African American/Black                 | 228 (3.4)                             | 84 (4.1)                                 |                            |
| Other                                  | 145 (2.2)                             | 38 (1.8)                                 |                            |
| Geographic region                      |                                       |                                          | 0.20                       |
| Northeast                              | 2,081 (31.2)                          | 592 (28.7)                               |                            |
| South                                  | 1,788 (26.8)                          | 662 (32.1)                               |                            |
| Midwest                                | 2,064 (30.9)                          | 674 (32.7)                               |                            |
| West                                   | 737 (11.1)                            | 135 (6.5)                                |                            |
| Principal hospital diagnosis           |                                       |                                          | 0.12                       |
| Major depressive disorder              | 4,650 (69.7)                          | 1,402 (68.0)                             |                            |
| Bipolar disorder                       | 1,285 (19.3)                          | 383 (18.6)                               |                            |
| Psychotic depression                   | 72 (1.1)                              | 15 (0.7)                                 |                            |
| Schizophrenia/schizoaffective disorder | 478 (7.1)                             | 153 (7.4)                                |                            |
| Other                                  | 185 (2.8)                             | 110 (5.3)                                |                            |
| Median income of zip code              |                                       |                                          | 0.08                       |
| <\$40,000                              | 925 (13.9)                            | 307 (14.9)                               |                            |
| \$40,000-\$60,000                      | 2,502 (37.5)                          | 841 (40.8)                               |                            |
| ≥\$60,000                              | 3,150 (47.2)                          | 884 (42.9)                               |                            |
| Past-year psychotropic medication use  |                                       |                                          |                            |

|                               |              |              |      |
|-------------------------------|--------------|--------------|------|
| Antidepressant                | 4,099 (61.5) | 1,181 (57.3) | 0.08 |
| Lithium                       | 501 (7.5)    | 120 (5.8)    | 0.07 |
| Antiepileptic mood stabilizer | 1,799 (27.0) | 501 (24.3)   | 0.06 |
| Antipsychotic                 | 3,140 (47.1) | 855 (41.4)   | 0.12 |

**References**

1. Centers for Medicare and Medicaid Services (CMS). CMS manual system: Pub. 100-04 Medicare claims processing. Available at: <https://www.cms.gov/Regulations-and-Guidance/Guidance/Transmittals/downloads/R126CP.pdf>. Accessed on April 5, 2021.
2. Research Data Assistance Center (ResDAC). 113 ICD-10 Cause of Death Recodes. Available at: <https://resdac.org/cms-data/variables/113-icd-10-cause-death-recodes>. Accessed on March 31, 2021.
3. Research Data Assistance Center (ResDAC). 358 ICD-10 Cause of Death Recodes. Available at: <https://resdac.org/cms-data/variables/358-icd-10-cause-death-recodes>. Accessed on March 31, 2021.
